## EVALUATION OF SYBR GREEN REAL TIME PCR FOR DETECTING SARS-CoV-2 FROM CLINICAL SAMPLES

Álvaro Fajardo<sup>1,2#</sup>, Marianoel Pereira-Gómez<sup>1,2#</sup>, Natalia Echeverría<sup>1,2#</sup>, Fernando López-Tort<sup>3</sup>,  
Paula Perbolianachis<sup>1,2</sup>, Fabián Aldunate<sup>1,2</sup>, Pilar Moreno<sup>1,2\*</sup>, Gonzalo Moratorio<sup>1,2\*</sup>

1 Laboratorio de Virología Molecular, Centro de Investigaciones Nucleares, Facultad de Ciencias, Universidad de la República, Montevideo, Uruguay

2 Laboratorio de Evolución Experimental de Virus, Institut Pasteur, Montevideo, Uruguay

3 Laboratorio de Virología Molecular, Sede Salto, Centro Universitario Regional Litoral Norte, Universidad de la República, Salto, Uruguay.

#These authors contributed equally to this work.

\*Corresponding authors:

Pilar Moreno, PhD. [pmoreno@fcien.edu.uy](mailto:pmoreno@fcien.edu.uy)

Gonzalo Moratorio, PhD. [moratorio@pasteur.edu.uy](mailto:moratorio@pasteur.edu.uy)

**Short running title:** qPCR for detecting SARS-CoV-2 using SYBR Green

**Keywords:** SARS-CoV-2, molecular detection, SYBR Green, RT-qPCR

## ABSTRACT

The pandemic caused by SARS-CoV-2 has triggered an extraordinary collapse of healthcare systems and hundred thousand of deaths worldwide. Following the declaration of the outbreak as a Public Health Emergency of International Concern by the World Health Organization (WHO) on January 30<sup>th</sup>, 2020, it has become imperative to develop diagnostic tools to reliably detect the virus in infected patients. Several methods based on real time reverse transcription polymerase chain reaction (RT-qPCR) for the detection of SARS-CoV-2 genomic RNA have been developed. In addition, these methods have been recommended by the WHO for laboratory diagnosis. Since all these protocols are based on the use of fluorogenic probes and one-step reagents (cDNA synthesis followed by PCR amplification in the same tube), these techniques can be difficult to perform given the limited supply of reagents in low and middle income countries. In the interest of economy, time and availability of chemicals and consumables, the SYBR Green-based detection was implemented to establish a convenient assay. Therefore, we adapted one of WHO recommended Taqman-based one-step real time PCR protocols (from the University of Hong Kong) to SYBR Green. Our results suggest that SYBR-Green detection represents a reliable cost-effective alternative to increase the testing capacity.

## INTRODUCTION

Ever since SARS-CoV-2 was identified as the etiological agent of a novel disease, COVID-19, at the beginning of the current year (Gorbalenya et al. 2020; Zhu et al. 2020a), the World Health Organization (WHO) has been following up on its spread (World Health Organization (WHO) 2020a). In addition, most of the scientific work has been mainly focused on three areas: i) the characterization of this virus and the disease that it caused; ii) the rapid developing of diagnostic methods; and iii) the patient treatments (Dennis Lo and Chiu 2020).

The rapid spreading of SARS-CoV-2 highlights the need for an effective surveillance method to be widely used in different laboratory settings (Thompson 2020). This fact has prompted the development of a wide variety of molecular diagnostic methods based on the detection of viral genomic RNA. The vast majority rely on reverse transcription real time PCR (RT-qPCR), due to its high sensitivity and specificity (Chu et al. 2020; Corman et al. 2020; Huang et al. 2020; World Health Organization (WHO) 2020b; Zhu et al. 2020a). This technique, either as a one-step or a two-step protocol, has accelerated PCR laboratory procedures and has had the strongest impact on virology as it is being applied for detection, quantification, differentiation and genotyping of

animal and human viruses (Bankowski and Anderson 2004; Kaltenboeck and Wang 2005). Furthermore, it is regarded as a gold standard for analysis and quantification of pathogenic RNA viruses in clinical diagnosis (Espy et al. 2006). In particular, for the molecular diagnosis of COVID-19 the WHO website recommends few One-step RT-qPCR detection protocols that have been developed in different countries (World Health Organization (WHO) 2020b). Since all these protocols are based on the use of fluorogenic probes and one-step reagents (cDNA synthesis followed by PCR amplification in the same tube), these techniques are limited to the use of more specific reagents and can be quite expensive. Moreover, these protocols involve the amplification of more than one gene, which implies different probes and fluorescent channels.

Therefore, several researchers have attempted to develop alternative SARS-CoV-2 detection methods that might be faster or cheaper to implement, such as loop-mediated isothermal amplification (LAMP) (Jiang et al. 2020; Park et al. 2020; Yang et al. 2020; Zhang et al. 2020; Zhu et al. 2020b), droplet digital PCR (ddPCR) (Dong et al. 2020; Suo et al. 2020), multiplex PCR (Li et al. 2020) or even protocols based on CRISPR-Cas12 (Curti et al. 2020). Furthermore, considering the shortage in the supply of RNA extraction kits, others have evaluated alternative nucleic acids extraction methods (Bruce et al. 2020; Ladha et al. 2020; Zhao et al. 2020). Despite all these approaches, there is still much to be done to generate strategies that might be helpful for different laboratory settings.

Quantitative PCR (qPCR) is a molecular technique widely used when detection and/or quantification of a specific DNA target is needed. qPCR is based on fluorescence to measure the amount of a DNA target present at each cycle of amplification during the PCR. The most common ways of generating a fluorescent signal are by use of specific hydrolysis probes (i.e. TaqMan® probes), or a double-stranded DNA binding dye (i.e SYBR® Green). SYBR-Green-based detection method presents several advantages over Taqman chemistry ones, as being cheaper and not requiring the synthesis of specific probes.

This technique has already been proposed and used for laboratory testing of different pathogens, including viruses (Espy et al. 2006; Fernández et al. 2006; Gomes-Ruiz et al. 2006; Kumar et al. 2012), bacteria (Kositanont et al. 2007; Keerthirathne et al. 2016) and unicellular protozoan parasites (Espy et al. 2006; Haanshuus et al. 2019), among others. For SARS-CoV-2 detection, some preliminary reports have attempted to assess the sensitivity and predictive value of the different sets of primers and probes available (either commercially or *in-house* developed) (Barra et al. 2020; Casto et al. 2020; Jung et al. 2020), but so far, no comparison has been made between the different real time chemistries for this emerging virus.

The aim of the study was to set up an alternative molecular protocol to detect SARS-CoV-2 from clinical samples, without the need of TaqMan probes or post-PCR steps (i.e. gel electrophoresis), which can be implemented in case of difficulties to get specific reagents or kits because of the current pandemic situation. Here we showed that Taqman-based one-step real time PCR protocol recommended by the WHO (Chu et al. 2020; Poon et al. 2020) can be successfully adapted and alternatively used with SYBR Green-based two-step qPCR.. Besides, performing a comparison of the different molecular techniques by employing dilutions of control vectors and RNA standards for quantification, we tested our assay with 8 clinical samples collected from confirmed COVID-19 cases and one negative patient. Overall, our results showed that both approaches were able to detect SARS-CoV-2 from clinical samples.

## **MATERIALS AND METHODS**

### **Positive controls, clinical samples and ethical considerations**

Positive controls were kindly provided by Dr. Leo Poon from the University of Hong Kong. Positive controls contain a region of ORF1b-nsp14 or N targets of SARS-CoV Urban strain cloned into a standard plasmid. Residual de-identified nasopharyngeal samples were remitted to the Institut Pasteur Montevideo, that has been validated by the Ministry of Health of Uruguay as an approved center providing diagnostic testing for COVID-19.

### **SARS-CoV-2 One Step RT-qPCR protocol with fluorogenic probes**

The one-step RT-qPCR protocol evaluated in this study corresponded to the one developed by the University of Hong Kong (Chu et al. 2020; Poon et al. 2020), with modifications, which consists of two monoplex real-time RT-PCR assays targeting the ORF1b-nsp14 and N gene regions of SARS-CoV-2 (Supplementary Table 1). Concentrations used were lowered to avoid non-specific amplification (data not shown). Briefly, a 20µL monoplex reaction contained 5µL of 4x TaqMan Fast Virus Master Mix (Thermo Fisher), 0.6µL of each primer (0.3µM final concentration each), 0.2µL of the probe (0.1µM final concentration) and 4µL of RNA. These monoplexes were performed for both N and ORF1b-nsp14 regions. Thermal cycling was run on a Step-One Plus RT-PCR thermal cycler (Applied Biosystems) with the following cycle parameters: 50°C for 5min for reverse transcription, inactivation of reverse transcriptase at 95°C for 20s and then 40 cycles of 95°C for 5s and 60°C for 30s. The expected amplicon sizes of ORF1b-nsp14 and N are 132bp and 110bp, respectively. This protocol was carried out with serial dilutions of plasmids containing N and ORF1b-nsp14 genes

(kindly provided by Dr. Leo Poon from the School of Public Health, University of Hong Kong), RNA standards of the same targets constructed in our laboratory, and later validated with RNA samples of COVID-19 cases. A non-template control (nuclease-free water) was included in every one-step RT-qPCR run. We manually set the threshold value to 0.015 in all assays to determine the threshold cycle ( $C_t$ ). A test run for the amplification of the controls was done to select the appropriate dilution to use for the amplification of the clinical samples, which were, in turn, run in duplicates.

### **SARS-CoV-2 qPCR protocol with SYBR Green**

First, complementary cDNA of SARS-CoV-2 clinical samples was generated using SuperScript II Reverse Transcriptase (Invitrogen), random primers and 10 $\mu$ L of RNA, according to the manufacturer's instructions.

qPCR reactions were carried out using a Step-One Plus RT-PCR thermal cycler (Applied Biosystems), Luna Universal qPCR Master Mix (New England Biolabs), following manufacturer's instructions, and the same primers previously used in the One Step RT-qPCR Taqman protocol. Each 20 $\mu$ L reaction contained 10 $\mu$ L of 2x Master Mix (NEB), 0.5 $\mu$ L of each primer (0.25 $\mu$ M final concentration each) and 4 $\mu$ L of cDNA. Again, non-template control (nuclease-free water) was included in every qPCR run as a negative control. In this case, we set the threshold value to 0.2 in all assays to determine the  $C_t$ . As with the probe-based protocol, a test run for the amplification of the control plasmids was done to select the appropriate dilution to use for the amplification of the clinical samples, which were, in turn, run in duplicates. The cycling conditions were: initial denaturation at 95°C for 1min, 40 PCR cycles of 95°C for 15s and 60°C for 30s, followed by a melting curve ranging from 60°C to 95°C (acquiring fluorescence data every 0.3°C). With the aim of verifying specific amplification, in addition to the melting curve step during the run, we also confirmed the amplicon sizes by 2% agarose gel electrophoresis.

### **Construction of RNA for quantification standards**

A fragment of 132 and 110 bp containing the ORF1b-nsp14 and N targets, respectively, were cloned into pCR<sup>TM</sup>2.1-TOPO<sup>®</sup> using the TOPO<sup>®</sup> TA Cloning<sup>®</sup> Kit (Invitrogen) following manufacturer's instructions and transformed in NEB<sup>®</sup> 5-alpha Competent *E. coli* (High Efficiency) by the heat shock method (42°C, 30 s). Plasmids were isolated using PureLink Quick Plasmid Miniprep Kit (Invitrogen) and quantified by spectrophotometric analysis (Biophotometer, Eppendorf). Then, 1 $\mu$ g of each plasmid was linearized with *SpeI* and *in vitro* transcribed with T7 RNA Polymerase (Thermo Fisher) following the manufacturer's instructions. *In vitro* transcribed RNA was treated with DNase and purified with TURBO DNA-free<sup>TM</sup> Kit (Thermo Fisher). RNA

purified was checked for size and integrity by gel electrophoresis. The number of copies/ $\mu\text{L}$  was calculated as:  $(N_A \times C) / \text{MW}$ , where,  $N_A$  is the Avogadro constant expressed in  $\text{mol}^{-1}$ ,  $C$  is the concentration expressed in  $\text{g}/\mu\text{L}$ , and MW is the molecular weight expressed in  $\text{g}/\text{mol}$ .

### **Determination of the sensitivity of the assays by standard curves**

A stock containing around  $2 \times 10^{13}$  copies/ $\mu\text{L}$  (for both ORF1b-nsp14 and N) was used for standard curve and sensitivity determination of the qPCR assays. The standard curve and sensitivity were determined by 10-fold serial dilutions. In the case of the one-step probe-based qPCR assays,  $4\mu\text{L}$  of RNA was directly added to the mix and run, in triplicates, as mentioned above. For the two-step SYBR Green-based qPCR  $4\mu\text{L}$  of the same 10-fold serial dilutions of the *in vitro* transcribed RNA for each target were retrotranscribed and then  $4\mu\text{L}$  of the cDNA was used as template for SYBR Green qPCR. Each cDNA was run in duplicates. Standard curves were represented as  $C_t$  vs log copy number/reaction. The lower limit of detection was defined as the lowest copy number of target/qPCR, taking account for dilution, which amplified reliably.

### **Molecular cloning of N amplicons from clinical samples and Sanger sequencing**

PCR products generated by the qPCR protocol with SYBR Green contain dA overhangs at the 3' ends. Therefore, the fresh PCR products of the N target from samples 1, 3, 4 and 6 were directly cloned into pCR<sup>TM</sup>2.1-TOPO<sup>®</sup> using the TOPO<sup>®</sup> TA Cloning<sup>®</sup> Kit (Invitrogen) following manufacturer's instructions. Next, cloning reactions were transformed in NEB<sup>®</sup> 5-alpha Competent *E. coli* (High Efficiency) by the heat shock method ( $42^\circ\text{C}$ , 30 s), plated in LB medium containing 50  $\mu\text{g}/\text{mL}$  ampicillin (Amp),  $40\mu\text{L}$  Xgal (40  $\text{mg}/\text{mL}$ ), 10  $\mu\text{L}$  IPTG (100 mM) and incubated at  $37^\circ\text{C}$  overnight. Three individual white colonies for each cloning reaction were isolated and overnight cultured in LB containing 50  $\mu\text{g}/\text{mL}$  ampicillin. Plasmids were isolated using PureLink Quick Plasmid Miniprep Kit (Invitrogen) and Sanger sequenced with the universal primers M13Forward and M13Reverse.

### **Sequences analysis**

Ab1 files from Sanger sequencing were analyzed using the Staden package v1.7.0 (<http://staden.sourceforge.net>). MEGAX (<http://www.megasoftware.net>) was used to perform sequence analysis.

## ***In silico* estimation of the DNA Melting Temperature**

GC content and DNA melting temperature of ORF1b-nsp14 and N targets from SARS Urbani isolate (MK062184) and SARS-CoV-2 (MT358402) were estimated using the DNA Melting Temperature (T<sub>m</sub>) Calculator (available at <http://www.endmemo.com/bio/tm.php>). The rationale for setting the parameters was to emulate as much as possible SYBR-Green qPCR conditions used in this study. To do so, the salt and magnesium concentration were set at 50 mM and 1.5 mM, respectively, as it is indicated by the manufacturer. Initial DNA copy numbers were obtained using the C<sub>t</sub> values empirically observed in the SYBR Green qPCR for the positive control and the clinical samples for both targets (showed in Table 2). Then, we interpolated them in their corresponding standard curve in order to estimate the initial number of copies in the qPCR reaction. After this, we calculated the number of target copy numbers after one PCR cycle and estimated the DNA concentration for each sequence expressed as nM using the DNA/RNA Copy Number Calculator from the <http://www.endmemo.com/bio/dnacopynum.php> website.

## **RESULTS**

### **Set up of qPCR protocols (SYBER Geen and Taqman chemistry) with DNA controls for ORF1b-nsp14 and N targets**

In order to select an appropriate amount of control vector to use in the comparison between the two real time qPCR methods, we prepared plasmids dilutions (10<sup>7</sup>, 10<sup>6</sup>, 10<sup>5</sup> and 10<sup>4</sup> copies/μL) and assayed them following both protocols: the probe-based One Step RT-qPCR developed by the University of Hong Kong (Chu et al. 2020; Poon et al. 2020) and the *in-house* SYBR Green-based protocol adapted in this study. It is worth mentioning that previous results, of our laboratory, had indicated that a lower amount of primers and probes than initially suggested by Poon et al. (2020), rendered similar positive results, and diminished the amplification of primer dimers (data not shown). Real time PCR results, from SYBER and Taqman chemistries, of different dilutions of the control vectors for the targeted regions (ORF1b-nsp14 and N) are shown in Figure 1 (panels A, B, C and D). Since all dilutions amplified correctly and below a C<sub>t</sub> of 37 (Fig. 1 and Table 1), we decided to use 10<sup>6</sup> copy number/μL as a positive control for subsequent assays (for both ORF1b-nsp14 and N genes).

Analyzing the specificity of the SYBR Green-based qPCR method (Fig. 1, panels E to H) from ORF1b-nsp14, we verify the presence of only one PCR product, corroborated by a unique melting



peak ( $T_m=81.55^\circ\text{C}$ ) (Fig. 1E and Table 1). Agarose gel electrophoresis (Fig. 1G) allowed also the verification of the expected product size (132bp) with no amplification in the negative control. In the case of the SYBR Green-based qPCR method for N gene amplification we can observed (Fig. 1D and F, for all N dilutions, a very clear peak at  $T_m=81.70^\circ\text{C}$ , together with a non-symmetric melting temperature peak slightly skewed to a higher temperature, which might suggest the presence of two PCR products. However, when we run the PCR products on an agarose gel only one product of the expected size (110bp) is observed (Fig 1H), demonstrating that the presence of a double peak was not indicative of non-specific amplification.. For the non-template-control we observed a slight amplification ( $C_t=37.76$ ), although the melting curve evidenced a non-specific peak ( $T_m=71.57^\circ\text{C}$ )



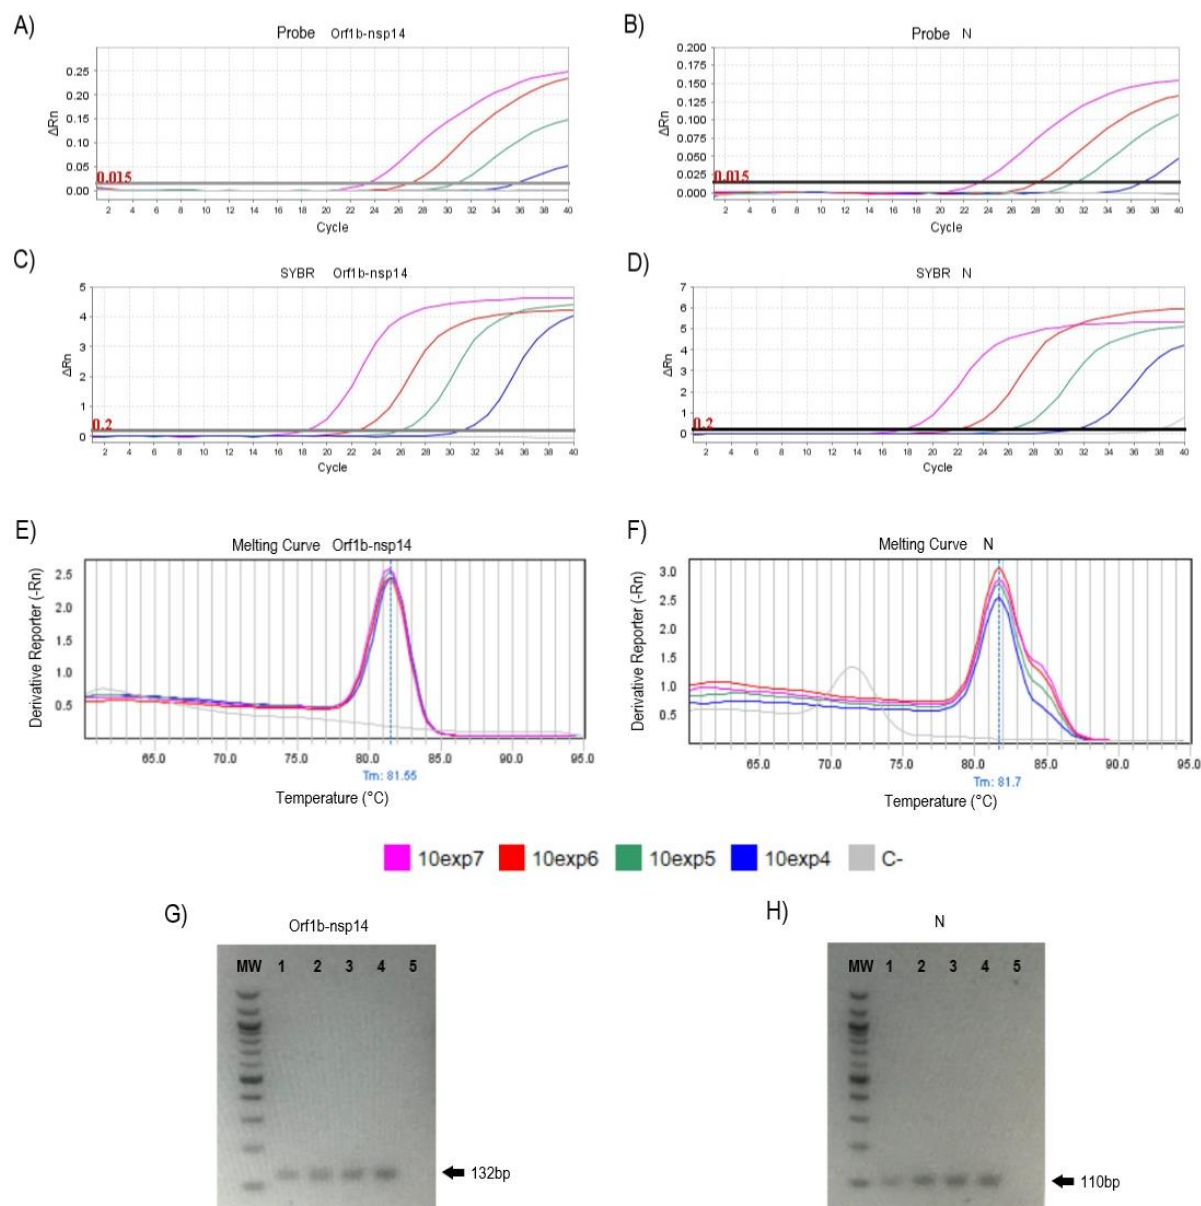

**Figure 1. Real time PCR results, from SYBER and Taqman chemistries, of different dilutions of the control vectors for the targeted regions: ORF1b-nsp14 and N (left and right panels, respectively). A) and B) show the amplification plots for the RT-qPCR protocol employing fluorogenic probes. C) and D) show the amplification plots for the qPCR protocol developed in this study employing SYBR Green as a nucleic acid dye. E) and F) show the melting curves for the products amplified with the SYBR Green-based qPCR protocol. Below these panels are the references for each of the dilutions assayed expressed in plasmid copies (C-: non-template control). G) and H) show agarose gel electrophoresis of PCR products amplified with the SYBR Green-based qPCR protocol. MW: 100bp DNA Molecular Weight (New England Biolabs); lanes 1 to 4: control dilutions ( $10^4$ ,  $10^5$ ,  $10^6$  and  $10^7$  copies/ $\mu$ L, respectively); lane 5: non-template-control.**

**Table 1.** Ct values and melting temperatures (Tm) of the amplified control dilutions according to the probe-based RT-qPCR protocol versus the SYBR Green-based qPCR protocol developed in this work.

| Target      | Copy number     | Probe-based          | SYBR Green-based   |         |
|-------------|-----------------|----------------------|--------------------|---------|
|             |                 | Ct (Threshold 0.015) | Ct (Threshold 0.2) | Tm (°C) |
| ORF1b-nsp14 | 10 <sup>4</sup> | 35.79                | 31.08              | 81.55   |
|             | 10 <sup>5</sup> | 30.78                | 26.11              | 81.40   |
|             | 10 <sup>6</sup> | 26.93                | 22.54              | 81.40   |
|             | 10 <sup>7</sup> | 23.38                | 18.40              | 81.40   |
|             | C-              | 40.00                | 40.00              |         |
| N           | 10 <sup>4</sup> | 37.07                | 31.27              | 81.70   |
|             | 10 <sup>5</sup> | 31.52                | 26.03              | 81.70   |
|             | 10 <sup>6</sup> | 28.19                | 21.93              | 81.70   |
|             | 10 <sup>7</sup> | 23.47                | 17.61              | 81.70   |
|             | C-              | 40.00                | 37.76              | 71.57*  |

C -: non-template-control

\* Non-specific amplification

## Validation of both qPCR methods using clinical samples

To validate the SYBR Green qPCR protocol, we assayed a set of 8 RNA samples from COVID-19 cases with both qPCR methods and both genetic regions. These samples were beforehand determined as SARS-CoV-2 positive (samples 1 to 7) and negative (sample 8), employing the diagnostic kit provided by the Panamerican Health Organization (Berlin Protocol). The results obtained, with both qPCR assays chemistries and genetic regions, were in agreement with the data previously gathered for these samples (Fig. 2 and 3).

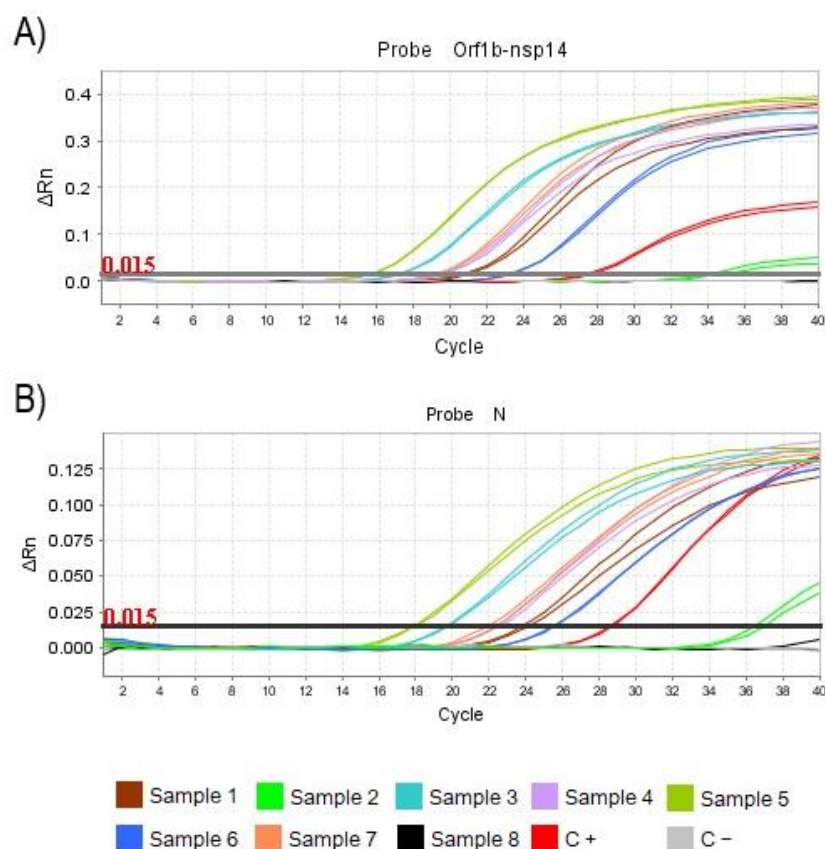

**Figure 2. Amplification plots for the RT-qPCR protocol employing Taqman probes to detect SARS-CoV-2 in clinical samples.** Adapted method previously described by Poon et al. 2020. As a positive control (C+),  $10^6$  copies/ $\mu$ L of each vector were used. DEPC water was used as non-template-control (C-). Each sample was assayed in duplicate. **A)** Detection of ORF1b-nsp14 region. **B)** Detection of N region. The references for both panels are indicated below panel B.

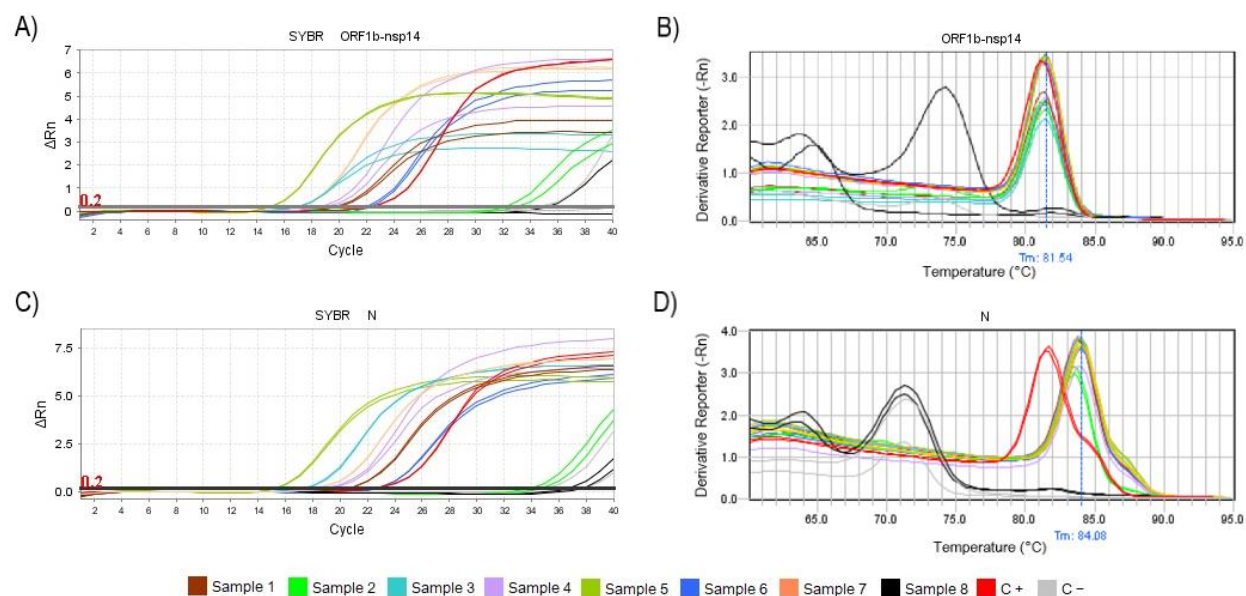

**Figure 3. qPCR results of the protocol employing SYBR Green to detect SARS-CoV-2 in clinical samples..** As a positive control (C+),  $10^6$  copies/ $\mu$ L of each vector were used., DEPC water was used as a non-template-control (C-). Each sample was assayed in duplicate. **A)** Amplification Plot and **B)** Melting curve for the detection of ORF1b-nsp14 region, respectively. **C)** Amplification Plot and **D)** Melting curve for the detection of N region, respectively. The references for all panels are indicated at the bottom of the figure.

**Table 2.** Average  $C_t$  values and melting temperatures ( $T_m$ ) of the clinical samples (run in duplicates) according to the probe-based RT-qPCR protocol versus the SYBR Green-based method developed in this work.

| Target      | Sample | Probe-based                        | SYBR Green-based                 |            |             |
|-------------|--------|------------------------------------|----------------------------------|------------|-------------|
|             |        | Average $C_t$<br>(Threshold 0.015) | Average $C_t$<br>(Threshold 0.2) | $T_m$ (°C) |             |
|             |        |                                    |                                  | Main peak  | Other peaks |
| ORF1b-nsp14 | 1      | 20.89                              | 19.94                            | 81.39      |             |
|             | 2      | 34.32                              | 32.69                            | 81.24      |             |
|             | 3      | 17.23                              | 17.08                            | 81.39      |             |
|             | 4      | 19.55                              | 18.94                            | 81.24      |             |
|             | 5      | 15.61                              | 15.15                            | 81.39      |             |
|             | 6      | 23.24                              | 22.11                            | 81.39      |             |
|             | 7      | 19.24                              | 17.14                            | 81.39      |             |
|             | 8      | -                                  | 35.30 $\ddagger$                 | 74.09*     | 63.65 $\#$  |
|             | C +    | 27.47                              | 22.52                            | 81.24      |             |
|             | C -    | -                                  | 34.84 $\ddagger$                 | 73.49*     |             |
| N           | 1      | 24.03                              | 20.68                            | 83.78      |             |
|             | 2      | 36.70                              | 34.50                            | 83.48      |             |
|             | 3      | 19.75                              | 17.51                            | 83.93      |             |
|             | 4      | 22.51                              | 19.42                            | 83.93      |             |
|             | 5      | 18.02                              | 15.33                            | 83.93      |             |
|             | 6      | 25.56                              | 22.73                            | 84.08      |             |
|             | 7      | 22.22                              | 18.53                            | 83.93      |             |
|             | 8      | -                                  | 37.27                            | 71.25*     | 63.80 $\#$  |
|             | C +    | 28.69                              | 22.86                            | 81.69      |             |
|             | C -    | -                                  | 36.47                            | 71.11*     | 71.40*      |

C +: positive control (10<sup>6</sup> copies/ $\mu$ L)

NA: Not applicable

$\ddagger$  Only one replicate amplified

\* Non-specific amplification

$\#$  Primer dimers

The amplification data for the SYBR Green-based qPCR protocol showed that the ORF1b-nsp14 region was correctly amplified for all SARS-CoV-2 positive samples (1 to 7) (Fig. 3). This was verified by melting curve analysis in every case, in agreement with the positive control (Fig. 3B and Table 2). In addition, sample 2, which was suspected to have a low viral load, was correctly amplified with this protocol. As for the negative viral RNA sample (sample 8), even though it seems to amplify in very late cycles (Fig. 3A and Table 2), the melting curve analysis reveals that the amplification corresponds to primer dimers and/or non-specific products (Fig. 3B and Table 2).

As in the case of ORF1b-nsp14 amplification, the amplification of N region allowed the correct assignment of all positive and negative clinical samples. The non-template controls, as well as sample 8 (negative for SARS-CoV-2), showed delayed non-specific amplification (Fig. 3C and 3D, and Table 2), which in principle does not invalidate the results, because are in agreement with the results of the assay using different dilutions of the control vectors. In addition, the clinical samples showed a skewed peak similar to the one that was previously observed for the positive control. (Fig. 3D). Taking together, these results suggest the specific amplification of N target. Despite all SARS-CoV-2 positive samples amplify the same product, they exhibit a higher  $T_m$  than the positive control ( $83.86 \pm 0.07^\circ\text{C}$  vs  $81.69^\circ\text{C}$ , respectively), effect that it was not observed for ORF1b-nsp14 target. This result can be explained as the positive control used in this study correspond to a SARS-CoV Urbani isolate (Genbank Accession number MK062184) which was used due to the unavailability of a SARS-CoV-2 positive control.

### **$T_m$ differences observed, in the N target amplification, between positive control and clinical samples are explained by differences in their GC content**

The  $T_m$  of a DNA fragment depends on a variety of features such as its length, GC composition, sequence and concentration, among others. Given the results previously described, we hypothesized that the difference between the  $T_m$  of the positive control and the clinical samples assayed here was due to a higher GC content in the N target from Uruguayan patients. To test this, we first cloned 5 of 7 PCR product obtained from the clinical samples and sequenced one molecular clone for each (Figure 4). The results showed that all sequences were identical between them and a BLAST search showed that all cloned sequences had 100% identity with SARS-CoV-2, confirming that SYBR-Green based qPCR specific amplified viral RNA present in the clinical samples.

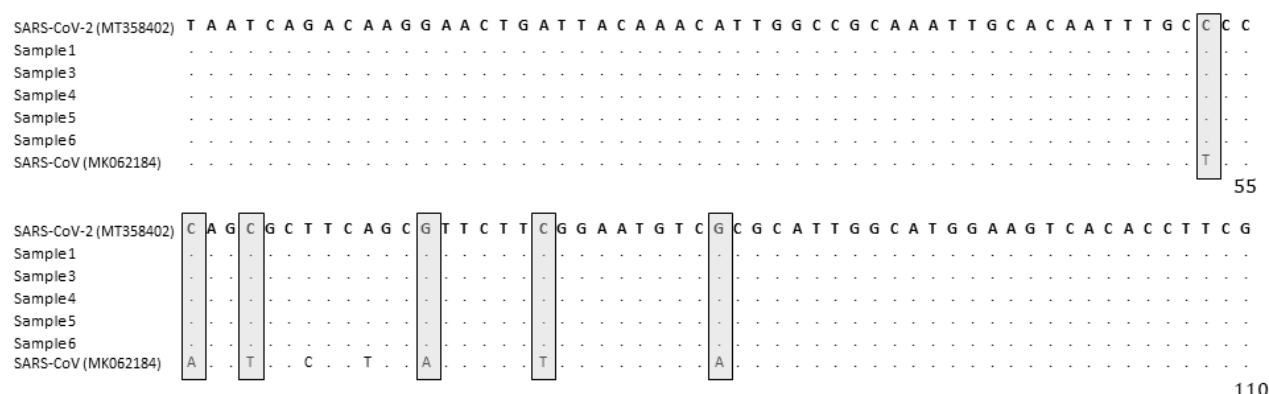

**Figure 4. Sequences of molecular clones from the clinical samples.** Sequences alignment of the N target amplicon for SARS-CoV-2, SARS-CoV (positive control) and molecular clones obtained from clinical samples used in this study. All clones fully matched with the SARS-CoV-2 sequence. Below is shown the sequence of the N target for the positive control. Boxes indicate nucleotide positions (6/110) which contribute to an increment in the GC content of the SARS-CoV-2 sequences, compared to the sequence of SARS-CoV. Accession numbers are indicated between brackets.

We then calculated the GC content as well as the  $T_m$  was *in silico* estimated for the amplicon sequences of the N target from clinical samples. Comparisons were made taking as reference the the N target of the SARS-CoV Urbani strain, which was used as positive control (Table 3). Given the *in silico*  $T_m$  estimates, the N amplicons obtained for SARS-CoV-2 samples should have a higher  $T_m$  (around 2°C) than that of SARS-CoV Urbani strain, which confirms that the  $T_m$  differences observed for N amplicon derive from their different GC content. The magnitude of the  $T_m$  gain correlated positively with the GC% (Pearson,  $r = 0.843$ ,  $P < 0.001$ ). Therefore, we conclude that the observed differences on the  $T_m$  of N targets from clinical samples were due to differences in their GC content.

**Table 3.** GC content and differences between  $T_m$  empirically observed and *in silico* estimated for N amplicons of SARS-CoV (positive control) and SARS-CoV-2 (clinical samples) in SYBR Green-based qPCR assays. Observed values for positive control and clinical samples were taken from Table 2. Observed values for clinical samples were averaged.

| Target | Sample           | GC (%) | Ct observed      | $T_m$ observed (°C) | $T_m$ estimated (°C) |
|--------|------------------|--------|------------------|---------------------|----------------------|
| N      | C+               | 44.55  | 22.86            | 81.69               | 81.12                |
|        | Clinical samples | 49.09  | $21.24 \pm 2.21$ | $83.86 \pm 0.07$    | 83.10                |



## Limit of quantitation of Taqman probe and SYBR-Green based qPCRs

Finally, to determine the limit of quantitation of both SARS-CoV-2 detection qPCR approaches, serial dilutions of an RNA standard for each target were performed (Figure 5). As expected, the  $C_t$  of each reaction increased along with the lower number of target copies/reaction. The  $C_t$  values showed an inverse linear relationship with the log value of the RNA concentrations with a very high correlation ( $R^2 > 0.99$  in all cases). The results showed that the limit of quantitation for ORF1b-nsp14 and N targets were equal to  $10^3$  copies/reaction for probe-based qPCR (Figure 5A and 5C) and  $20 \times 10^3$  copies/reaction (Figure 5B and 5D) for SYBR-Green qPCR assays.

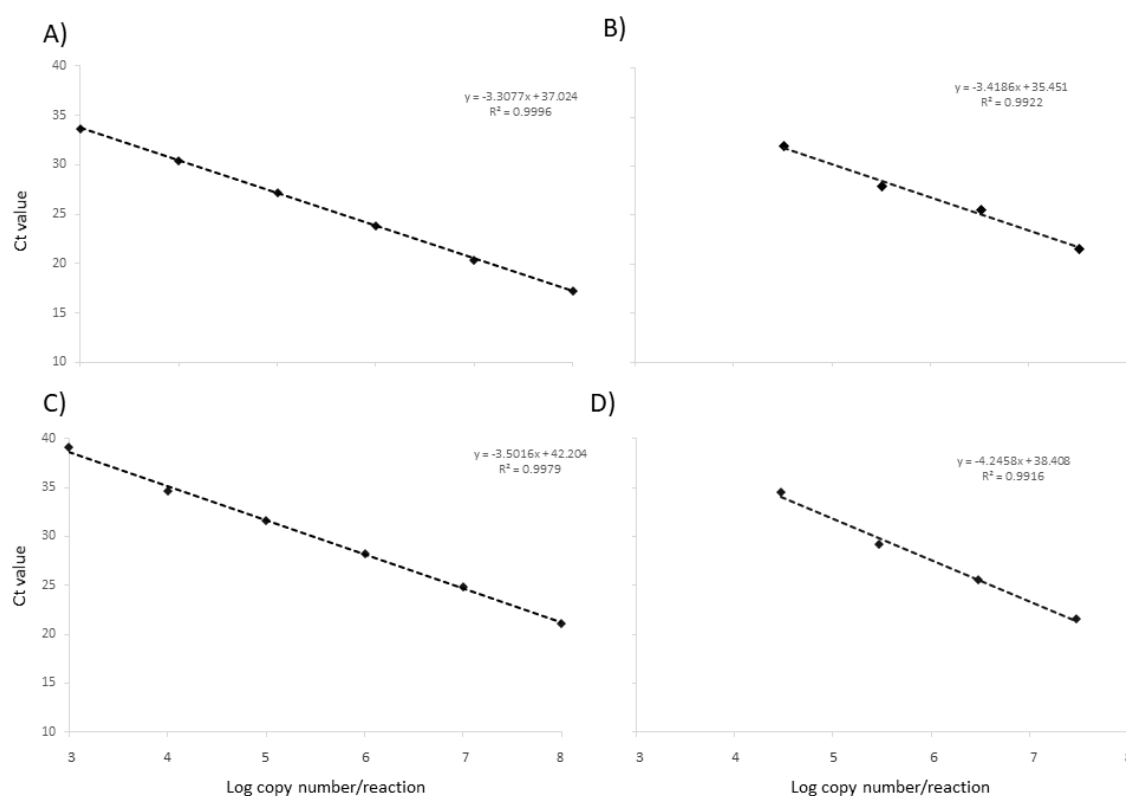

**Figure 5. Standard curves of Taqman and SYBR Green based qPCR for targets ORF1b-nsp14 and N.** Serially diluted RNA containing ORF1b-nsp14 (A, B) or N (C, D) targets were amplified and analyzed in both one-step (A, C) and two-step (B, D) qPCR protocols. The threshold cycle ( $C_t$ ) mean values were plotted against copy number of RNA standards/reaction. The coefficient of determination ( $R^2$ ) and the lineal regression curve ( $y$ ) were determined. Each dilution was performed in triplicates (Taqman assays) or duplicates (SYBR Green assays).

## DISCUSSION

The qPCR technique is widely used in clinical virology diagnostic laboratories because of its high sensitivity, specificity, reproducibility and no need of post PCR steps (Josko 2010). Additionally, qPCR allows for quantification because during the amplification of the target, it reaches a threshold level that correlates with the amount of initial target sequence (Valasek and Repa 2005). SYBR-Green based qPCR has relatively low cost benefit, whereas Taqman-based qPCR are more expensive. In addition, the specificity of the qPCR is mainly provided by the use of specific primers, although Taqman probes increase the specificity because only sequence-specific amplifications are measured (Tajadini et al. 2014).

Our results with SYBR Green chemistry were consistent with the initial probe-based protocol designed by Poon et al. (2020) showing sensitivity to specifically detect SARS-CoV-2. It is worth noting that the original protocol (Chu et al. 2020; Poon et al. 2020) suggested the use of the N target for screening analyses, whereas the amplification of ORF1b-nsp14 was indicated as a confirmatory assay. ORF-nsp14 encodes for a very conserved exoribonuclease present in all known coronaviruses which is involved in replication fidelity (Eckerle et al. 2007, 2010). The N gene encodes for the structural nucleoprotein, which is more exposed to the recognition of the host immune system and therefore could be more prone to change than ORF-nsp14 (Woo et al. 2010). Importantly, if mutations occur within the probe-binding site, they would prevent the annealing of the probe and its subsequent detection. Although coronaviruses are between the RNA viruses with lower mutation rates (Sanjuan et al. 2010), it would be possible that new mutations impact negatively on the probe detection. Therefore, counting on an alternative detection method such as SYBR Green-based two-step qPCR, that only requires two conserved regions for primer binding instead of three (for hybridization probe), it might become useful. In this context, our results with SYBR Green chemistry may provide a simpler and cheaper alternative for SARS-CoV-2 detection.

Here we reported a lower limit of detection of the Taqman probe-based approach compared to the SYBR-Green based qPCR. In addition to the decrease in specificity due to the lack of use of a probe, SYBR Green-based qPCR approach needs a previous step of cDNA synthesis. This extra step represents a possible source of contamination that can affect the results. In order to increase the specificity of the SYBR Green-based qPCR assayed here, we could evaluate the use of specific primer instead of random hexamers during the retrotranscription step. Another disadvantage of the SYBR Green vs probe-based qPCR is that any non-specific product including primer-dimer can lead to false positive results. For this reason, the melting curve analysis must be performed to confirm that only specific amplification was obtained.

Although multiplexed qPCR is more frequently developed for Taqman technology, our results suggest that a multiplexed SYBR Green-based qPCR could be developed for SARS-CoV-2 detection. The difference of the GC% content among the targets Orf-nsp14 and N which produce a  $T_m$  difference of 2°C, seems to be enough for simultaneous detection of both targets in the same tube. In this case, after melting curve analysis two specific double peaks should be observed.

Altogether, both SYBR Green-based qPCR and Taqman probe-based qPCR assays for detecting SARS-CoV-2 were set up in our laboratory conditions and their consistencies, as well as their advantages and disadvantages, were analyzed. This work could help to increase the testing capacity of some places in the world with limited access to Taqman specific reagents, given the current lockdown of many countries.

## **ACKNOWLEDGEMENTS**

We thank Dr. Leo Poon and his group (School of Public Health, The University of Hong Kong) for kindly providing us with the control vectors for ORF1b-nsp14 and N regions of SARS-CoV used in this work.

## **AUTHORS' CONTRIBUTIONS**

PM, GM conceptualized the study design; AF, FLT, FA, PP, MP-G performed the laboratory tests; NE and MP-G plotted the figures; AF, FLT, FA, PP, NE, MP-G, PM, GM analyzed the data and interpreted the results; NE, MP-G, PM and GM wrote the manuscript. All authors read and approved the final report.

## **FUNDING**

This work was supported by Agencia Nacional de Investigación e Innovación (ANII), PEDECIBA and Comisión Académica de Posgrados, Universidad de la República Uruguay (UdelaR).

## **CONFLICT OF INTEREST**

The authors declare no conflict of interest.

## REFERENCES

- Aldea C, Alvarez CP, Folgueira L, et al (2002) Rapid detection of herpes simplex virus DNA in genital ulcers by real-time PCR using SYBR Green I dye as the detection signal. *J Clin Microbiol.* <https://doi.org/10.1128/JCM.40.3.1060-1062.2002>
- Ando Y, Terao K, Narita M, et al (2002) Quantitative analyses of cytomegalovirus genome in aqueous humor of patients with cytomegalovirus retinitis. *Jpn J Ophthalmol.* [https://doi.org/10.1016/S0021-5155\(01\)00524-X](https://doi.org/10.1016/S0021-5155(01)00524-X)
- Bankowski MJ, Anderson SM (2004) Real-Time Nucleic Acid Amplification in Clinical Microbiology. *Clin Microbiol Newsl.* [https://doi.org/10.1016/S0196-4399\(04\)90003-7](https://doi.org/10.1016/S0196-4399(04)90003-7)
- Barra GB, Rita THS, Mesquita PG, et al (2020) Analytical sensibility and specificity of two RT-qPCR protocols for SARS-CoV-2 detection performed in an automated workflow. *medRxiv.* <https://doi.org/10.1101/2020.03.07.20032326>
- Bhullar SS, Chandak NH, Purohit HJ, et al (2013) Determination of viral load by quantitative real-time PCR in herpes simplex encephalitis patients. *Intervirology.* <https://doi.org/10.1159/000351521>
- Bruce EA, Tighe S, Hoffman JJ, et al (2020) RT-qPCR DETECTION OF SARS-CoV-2 RNA FROM PATIENT NASOPHARYNGEAL SWAB USING QIAGEN RNEASY KITS OR DIRECTLY VIA OMISSION OF AN RNA EXTRACTION STEP. *bioRxiv.* <https://doi.org/10.1101/2020.03.20.001008>
- Casto AM, Huang M-L, Nalla A, et al (2020) Comparative Performance of SARS-CoV-2 Detection Assays using Seven Different Primer/Probe Sets and One Assay Kit. *medRxiv.* <https://doi.org/10.1101/2020.03.13.20035618>
- Certoma A, Lunt RA, Vosloo W, et al (2018) Assessment of a Rabies Virus Rapid Diagnostic Test for the Detection of Australian Bat Lyssavirus. *Trop Med Infect Dis* 3:.. <https://doi.org/10.3390/tropicalmed3040109>
- Chu DKW, Pan Y, Cheng SMS, et al (2020) Molecular Diagnosis of a Novel Coronavirus (2019-nCoV) Causing an Outbreak of Pneumonia. *Clin Chem.* <https://doi.org/10.1093/clinchem/hvaa029>
- Corman VM, Landt O, Kaiser M, et al (2020) Detection of 2019 novel coronavirus (2019-nCoV) by real-time RT-PCR. *Euro Surveill.* <https://doi.org/10.2807/1560-7917.ES.2020.25.3.2000045>
- Côté S, Abed Y, Boivin G (2003) Comparative evaluation of real-time PCR assays for detection of the human metapneumovirus. *J Clin Microbiol.* <https://doi.org/10.1128/JCM.41.8.3631-3635.2003>
- Curti L, Pereyra-Bonnet F, Gimenez C (2020) An ultrasensitive, rapid, and portable coronavirus SARS-CoV-2 sequence detection method based on CRISPR-Cas12. *bioRxiv.* <https://doi.org/10.1101/2020.02.29.971127>
- Dennis Lo YM, Chiu RWK (2020) Racing towards the development of diagnostics for a novel coronavirus (2019-nCoV). *Clin Chem.* <https://doi.org/10.1093/clinchem/hvaa038>
- Dong L, Zhou J, Niu C, et al (2020) Highly accurate and sensitive diagnostic detection of SARS-CoV-2 by digital PCR. *medRxiv.* <https://doi.org/10.1101/2020.03.14.20036129>
- Eckerle LD, Becker MM, Halpin RA, et al (2010) Infidelity of SARS-CoV Nsp14-exonuclease mutant virus replication is revealed by complete genome sequencing. *PLoS Pathog* 6:1–15. <https://doi.org/10.1371/journal.ppat.1000896>
- Eckerle LD, Lu X, Sperry SM, et al (2007) High Fidelity of Murine Hepatitis Virus Replication Is Decreased in nsp14 Exoribonuclease Mutants. *J Virol* 81:12135–12144. <https://doi.org/10.1128/jvi.01296-07>
- Ellerbrok H, Jacobsen S, Patel P, et al (2017) External quality assessment study for ebolavirus PCR-diagnostic promotes international preparedness during the 2014 – 2016 Ebola outbreak in West Africa. *PLoS Negl Trop Dis* 11:.. <https://doi.org/10.1371/journal.pntd.0005570>

- Espy MJ, Uhl JR, Sloan LM, et al (2006) Real-time PCR in clinical microbiology: Applications for routine laboratory testing. Clin. Microbiol. Rev.
- Fernández F, Gutiérrez J, Sorlózano A, et al (2006) Comparison of the SYBR Green and the hybridization probe format for real-time PCR detection of HHV-6. Microbiol Res. <https://doi.org/10.1016/j.micres.2005.07.007>
- Gomes-Ruiz AC, Nascimento RT, De Paula SO, Lopes Da Fonseca BA (2006) SYBR green and TaqMan real-time PCR assays are equivalent for the diagnosis of dengue virus type 3 infections. J Med Virol. <https://doi.org/10.1002/jmv.20620>
- Gorbalenya AE, Baker SC, Baric RS, et al (2020) The species Severe acute respiratory syndrome-related coronavirus: classifying 2019-nCoV and naming it SARS-CoV-2. Nat Microbiol. <https://doi.org/10.1038/s41564-020-0695-z>
- Haanshuus CG, Mørch K, Blomberg B, et al (2019) Assessment of malaria real-time PCR methods and application with focus on lowlevel parasitaemia. PLoS One. <https://doi.org/10.1371/journal.pone.0218982>
- Huang C, Wang Y, Li X, et al (2020) Clinical features of patients infected with 2019 novel coronavirus in Wuhan, China. Lancet. [https://doi.org/10.1016/S0140-6736\(20\)30183-5](https://doi.org/10.1016/S0140-6736(20)30183-5)
- Jiang M, Fang W, Aratehfar A, et al (2020) Development and validation of a rapid single-step reverse transcriptase loop-mediated isothermal amplification (RT-LAMP) system potentially to be used for reliable and high-throughput screening of COVID-19. medRxiv. <https://doi.org/10.1101/2020.03.15.20036376>
- Josko D (2010) Molecular virology in the clinical laboratory. Clin Lab Sci 23:231–236. <https://doi.org/10.29074/ascls.23.4.231>
- Jung YJ, Park G-S, Moon JH, et al (2020) Comparative analysis of primer-probe sets for the laboratory confirmation of SARS-CoV-2. bioRxiv. <https://doi.org/10.1101/2020.02.25.964775>
- Kaltenboeck B, Wang C (2005) Advances in Real-Time PCR: Application to Clinical Laboratory Diagnostics. Adv. Clin. Chem.
- Kares S, Lönnrot M, Vuorinen P, et al (2004) Real-time PCR for rapid diagnosis of entero- and rhinovirus infections using LightCycler. J Clin Virol. [https://doi.org/10.1016/S1386-6532\(03\)00093-3](https://doi.org/10.1016/S1386-6532(03)00093-3)
- Keerthirathne TP, Magana-Arachchi DN, Madegedara D, Sooriyapathirana SS (2016) Real time PCR for the rapid identification and drug susceptibility of Mycobacteria present in Bronchial washings. BMC Infect Dis 16:. <https://doi.org/10.1186/s12879-016-1943-y>
- Kositanont U, Rugsasuk S, Leelaporn A, et al (2007) Detection and differentiation between pathogenic and saprophytic Leptospira spp. by multiplex polymerase chain reaction. Diagn Microbiol Infect Dis 57:117–122. <https://doi.org/10.1016/j.diagmicrobio.2006.07.014>
- Kumar B, Kumar P, Rajput R, et al (2012) Comparative reproducibility of SYBR Green I and TaqMan real-time PCR chemistries for the analysis of matrix and hemagglutinin genes of Influenza A viruses. Int J Collab Res Intern Med Public Heal 4:1346–1352
- Ladha A, Joung J, Abudayyeh OO, Gootenberg JS (2020) A 5-min RNA preparation method for COVID-19 detection with. Cambridge, MA, USA
- Lanciotti RS, Kerst AJ, Nasci RS, et al (2000) Rapid detection of West Nile virus from human clinical specimens, field-collected mosquitoes, and avian samples by a TaqMan reverse transcriptase-PCR assay. J Clin Microbiol 38:4066–4071. <https://doi.org/10.1128/jcm.38.11.4066-4071.2000>
- Li C, Debruyne DN, Spencer J, et al (2020) High sensitivity detection of coronavirus SARS-CoV-2 using multiplex PCR and a multiplex-PCR-based metagenomic method. bioRxiv. <https://doi.org/10.1101/2020.03.12.988246>
- Park G-S, Ku K, Beak S-H, et al (2020) Development of Reverse Transcription Loop-mediated Isothermal Amplification (RT-LAMP) Assays Targeting SARS-CoV-2. bioRxiv. <https://doi.org/10.1101/2020.03.09.983064>
- Paudel D, Jarman R, Limkittikul K, et al (2011) Comparison of real-time SYBR green dengue

- assay with real-time taqman RT-PCR dengue assay and the conventional nested PCR for diagnosis of primary and secondary dengue infection. *N Am J Med Sci* 3:478–485. <https://doi.org/10.4297/najms.2011.3478>
- Poon L, Chu D, Peiris M (2020) Detection of 2019 novel coronavirus (2019-nCoV) in suspected human cases by RT-PCR
- Sanjuan R, Nebot MR, Chirico N, et al (2010) Viral Mutation Rates. *J Virol* 84:9733–9748. <https://doi.org/10.1128/jvi.00694-10>
- Smith IL, Northill JA, Harrower BJ, Smith GA (2002) Detection of Australian bat lyssavirus using a fluorogenic probe. *J Clin Virol* 25:285–291. [https://doi.org/10.1016/S1386-6532\(02\)00083-5](https://doi.org/10.1016/S1386-6532(02)00083-5)
- Suo T, Liu X, Guo M, et al (2020) ddPCR: a more sensitive and accurate tool for SARS-CoV-2 detection in low viral load specimens. *medRxiv*. <https://doi.org/10.1101/2020.02.29.20029439>
- Tajadini M, Panjehpour M, Javanmard S (2014) Comparison of SYBR Green and TaqMan methods in quantitative real-time polymerase chain reaction analysis of four adenosine receptor subtypes. *Adv Biomed Res* 3:85. <https://doi.org/10.4103/2277-9175.127998>
- Thompson (2020) Novel Coronavirus Outbreak in Wuhan, China, 2020: Intense Surveillance Is Vital for Preventing Sustained Transmission in New Locations. *J Clin Med*. <https://doi.org/10.3390/jcm9020498>
- Valasek MA, Repa JJ (2005) The power of real-time PCR. *Am J Physiol - Adv Physiol Educ* 29:151–159. <https://doi.org/10.1152/advan.00019.2005>
- Woo PCY, Huang Y, Lau SKP, Yuen KY (2010) Coronavirus genomics and bioinformatics analysis. *Viruses* 2:1805–1820
- World Health Organization (WHO) (2020a) Rolling updates on coronavirus disease (COVID-19)
- World Health Organization (WHO) (2020b) Coronavirus disease (COVID-19) technical guidance: Laboratory testing for 2019-nCoV in humans
- Yang W, Dang X, Wang Q, et al (2020) Rapid Detection of SARS-CoV-2 Using Reverse transcription RT-LAMP method. *medRxiv*. <https://doi.org/10.1101/2020.03.02.20030130>
- Zhang Y, Odiwuor N, Xiong J, et al (2020) Rapid Molecular Detection of SARS-CoV-2 (COVID-19) Virus RNA Using Colorimetric LAMP. *medRxiv*. <https://doi.org/10.1101/2020.02.26.20028373>
- Zhao Z, Cui H, Song W, et al (2020) A simple magnetic nanoparticles-based viral RNA extraction method for efficient detection of SARS-CoV-2. *bioRxiv*. <https://doi.org/10.1101/2020.02.22.961268>
- Zhu N, Zhang D, Wang W, et al (2020a) A novel coronavirus from patients with pneumonia in China, 2019. *N Engl J Med*. <https://doi.org/10.1056/NEJMoa2001017>
- Zhu X, Wang X, Han L, et al (2020b) Reverse transcription loop-mediated isothermal amplification combined with nanoparticles-based biosensor for diagnosis of COVID-19. *medRxiv*. <https://doi.org/10.1101/2020.03.17.20037796>



**Supplementary Table 1.** Information of primers and probes tested in this study from the University of Hong Kong protocol (Poon et al. 2020).

| Target      | Name             | Type           | Sequence                                 |
|-------------|------------------|----------------|------------------------------------------|
| ORF1b-nsp14 | HKU-ORF1b-nsp14F | Forward Primer | 5'-TGGGGYTTTACRGGTAACCT-3'               |
|             | HKU-ORF1b-nsp14R | Reverse Primer | 5'-AACRCGCTTAACAAAGCACTC-3'              |
|             | HKU-ORF1b-nsp14P | Probe          | 5'-FAM-TAGTTGTGATGCWATCATGACTAG-TAMRA-3' |
| N           | HKU-NF           | Forward Primer | 5'-TAATCAGACAAGGAACTGATTA-3'             |
|             | HKU-NR           | Reverse Primer | 5'-CGAAGGTGTGACTTCCATG-3'                |
|             | HKU-NP           | Probe          | 5'-FAM-GCAAATTGTGCAATTTGCGG-TAMRA-3'     |
